# Supplementary material for: Similarities and differences of dietary and other determinants of iodine status in pregnant women from three European birth cohorts
Source: Springer Nature journal article supplement (doi:10.1007/s00394-019-01913-w), 2019-02-07
Supplement: 394_2019_1913_MOESM1_ESM.pdf [file 394_2019_1913_MOESM1_ESM.pdf]

**Electronic Supplementary Material:****Similarities and differences of dietary and other determinants of iodine status in pregnant women from three European birth cohorts**

Mariana Dineva, Margaret P. Rayman, Deborah Levie, Mònica Guxens, Robin P. Peeters, Jesus Vioque, Llúcia González, Mercedes Espada, Jesús Ibarluzea, Jordi Sunyer, Tim I.M. Korevaar, Sarah C. Bath <sup>a</sup>

**<sup>a</sup> Corresponding author**

Dr Sarah C. Bath, Department of Nutritional Sciences, Faculty of Health and Medical Sciences, University of Surrey, Guildford GU2 7XH, United Kingdom. E-mail: s.bath@surrey.ac.uk.

**Table of Contents**

|                                                                                                                                                                                                                 |    |
|-----------------------------------------------------------------------------------------------------------------------------------------------------------------------------------------------------------------|----|
| <b>Multiple imputation</b> .....                                                                                                                                                                                | 2  |
| <b>Supplemental Table 1</b> Overview of the classification of foods into food groups by cohort ...                                                                                                              | 3  |
| <b>Supplemental Table 2</b> Determinants of urinary iodine-to-creatinine ratio measured at $\leq 18$ gestational weeks by cohort .....                                                                          | 5  |
| <b>Supplemental Table 3</b> Determinants of urinary iodine concentration measured at $\leq 18$ gestational weeks by cohort .....                                                                                | 9  |
| <b>Supplemental Table 4</b> Descriptives of dietary intakes of food groups (g/day) and energy intake (kcal/day) estimated from FFQ by cohort .....                                                              | 12 |
| <b>Supplemental Table 5</b> Multivariable associations of food group intakes estimated from FFQ (per 100 g/day) with urinary iodine-to-creatinine ratio measured at $\leq 18$ gestational weeks by cohort ..... | 13 |

## **Multiple imputation**

### **ALSPAC**

For the women in the analysis (n=2852), there were 2.6% missing values in total (n=1263) and 19.3% of the cases (n=550) had at least one missing value. Data were imputed for 12 out of the 15 variables used in the analysis, including pre-pregnancy BMI (n=250), ethnicity (n=96), parity (n=134), smoking status (n=51, smoking status variable was made from two imputed smoking variables with n=102 missing values in total), alcohol consumption (n=101, alcohol consumption variable was made from two imputed variables with n=159 missing values in total), education level (n=86), home ownership (n=72), crowding index (n=94), family adversity index (n=30), life event score (n=96), marital status (n=47), and living with a partner (n=97). Data were not imputed for gestational age, maternal age and child's sex due to no missing values.

### **Generation R**

For the women in the analysis (n=2254), there were 5.5% missing values in total (n=1369) and 31.7% of the cases (n=715) had at least one missing value. Data were imputed for nine out of 11 variables, including gestational age (n=1), pre-pregnancy BMI (n=12), ethnicity (n=71), smoking status (n=248), alcohol consumption (n=254), education level (n=149), net household income (n=479), marital status (n=154), and child's sex (n=1). Data were not imputed for maternal age and parity due to no missing values.

### **INMA**

For the women in the analysis (n=1460), there were 1.1% missing values in total (n=154) and 5.8% of the cases (n=84) had at least one missing value. Data were imputed for nine out of ten variables, including gestational age (n=4), maternal age (n=4), ethnicity (n=3), parity (n=2), smoking status (n=44), alcohol consumption (n=56), education level (n=5), living with a partner (n=1), and child's sex (n=35). Data were not imputed for pre-pregnancy BMI due to no missing values.

**Supplemental Table 1** Overview of the classification of foods into food groups by cohort

| <b>Food group</b>                           | <b>ALSPAC</b>                                                                                                                                                  | <b>Generation R</b>                                                                                                                                                                   | <b>INMA</b>                                                                                                                                                                                      |
|---------------------------------------------|----------------------------------------------------------------------------------------------------------------------------------------------------------------|---------------------------------------------------------------------------------------------------------------------------------------------------------------------------------------|--------------------------------------------------------------------------------------------------------------------------------------------------------------------------------------------------|
| <b>Vegetables</b>                           | green leafy vegetables (e.g., cabbage), other green vegetables (e.g., leeks), carrots, other root vegetables (e.g., turnip), salad vegetables (e.g., tomatoes) | leafy (e.g., spinach), root (e.g., carrots), cabbage, mixed salad vegetables, mushrooms, allium (e.g., onion, garlic), stems and sprouts (e.g., asparagus), fruiting (e.g., tomatoes) | leafy (e.g., spinach), root (e.g., carrots), cruciferous (e.g., broccoli), salad vegetables (e.g., lettuce), allium (e.g., onions, leek, garlic), fruiting (e.g., tomatoes, aubergines, peppers) |
| <b>Fruit</b>                                | fresh fruit (e.g., apple, grapes, banana)                                                                                                                      | fresh fruit (e.g., apple, grapes, banana), olives                                                                                                                                     | fresh fruit (e.g., apple, grapes, banana)                                                                                                                                                        |
| <b>Nuts and seeds</b>                       | nuts, tahini                                                                                                                                                   | nuts, seeds, nut spread                                                                                                                                                               | almonds, peanuts, hazelnuts, pine nuts                                                                                                                                                           |
| <b>Potatoes</b>                             | chips, roast potatoes, boiled/mashed/ jacket potatoes                                                                                                          | potatoes and other tubers (does not include potato crisps)                                                                                                                            | fried, boiled/roasted potatoes, potato crisps                                                                                                                                                    |
| <b>Legumes</b>                              | pulses (e.g., lentils, chickpeas), baked beans, peas, sweetcorn, broad beans                                                                                   | dried lentils, beans and peas                                                                                                                                                         | lentils, chickpeas, beans                                                                                                                                                                        |
| <b>Cereals and cereal products</b>          | breakfast cereals (e.g., oats, cornflakes, bran cereals), pasta, rice, bread, crispbreads, pizza                                                               | breakfast cereals, pasta, rice, bread, pretzels, crispbreads, pizza, flour and thickeners                                                                                             | breakfast cereals, pasta, rice, bread, boiled corn                                                                                                                                               |
| <b>Cakes, confectionery and added sugar</b> | cakes or buns, biscuits, chocolate bars (e.g., Mars), chocolate (e.g., dairy milk), sweets (e.g., toffees), pudding (e.g., cheesecake, mousse), sugar          | cakes, pastries, biscuits, candy bars, chocolate, non-chocolate sweets (e.g., toffees) jam, honey, sugar, ice cream, syrups, water ice                                                | cakes, pastries, biscuits, chocolate, jams, honey, sugar                                                                                                                                         |
| <b>Added fats</b>                           | animal fats (e.g., butter, ghee), vegetable oils and spreads (e.g., olive oil)                                                                                 | animal fats (e.g., butter), vegetable oils (e.g., olive oil), spreads and margarines                                                                                                  | animal fats (e.g., butter), vegetable oils and spreads (e.g., olive oil)                                                                                                                         |
| <b>Milk and dairy products</b>              | milk, cheese                                                                                                                                                   | milk, milk drinks, evaporated milk, yoghurt, fresh cheese (e.g., cottage cheese), cheese, milk puddings (e.g., mouse, cream base), cream                                              | fresh milk, condensed milk, yoghurt, cheese, custard, ice cream, cream                                                                                                                           |

**Supplemental Table 1** Overview of the classification of foods into food groups by cohort (*continued*)

| <b>Food group</b>                                                              | <b>ALSPAC</b>                                                                                                               | <b>Generation R</b>                                                                                             | <b>INMA</b>                                                                                                                                         |
|--------------------------------------------------------------------------------|-----------------------------------------------------------------------------------------------------------------------------|-----------------------------------------------------------------------------------------------------------------|-----------------------------------------------------------------------------------------------------------------------------------------------------|
| <b>Meat and meat products</b>                                                  | red meat, poultry, offal (e.g., liver), processed meat (e.g., sausages, burgers, bacon), pies and pasties (e.g., meat pies) | red meat, poultry, offal (e.g., liver), processed meat (e.g., sausage, pate)                                    | red meat, white meat (e.g., chicken), offal (e.g., liver), processed meat (e.g., sausages, pate, bacon)                                             |
| <b>Eggs</b>                                                                    | eggs, quiche                                                                                                                | eggs                                                                                                            | eggs                                                                                                                                                |
| <b>Fish and shellfish</b>                                                      | white fish (e.g., cod), oily fish (e.g., salmon), shellfish (e.g., prawns)                                                  | white fish (e.g., cod), oily fish (e.g., salmon), shellfish (e.g., prawns), processed fish (e.g., fish fingers) | boiled/fried/ grilled white fish (e.g., cod), boiled/fried/ grilled oily fish (e.g., salmon), seafood and shellfish (e.g., oysters, clams, lobster) |
| <b>Condiments and seasoning</b>                                                | N/A                                                                                                                         | seasonings (e.g., salt, herbs, spices)                                                                          | salt, including iodised salt                                                                                                                        |
| <b>Processed and fried foods</b><br>(e.g., sauces, soups, fried foods, crisps) | fried food (e.g., bacon, eggs, egg fried fish), crisps                                                                      | sauces (e.g., tomato, dressings, mayonnaise), soups, bouillons                                                  | vegetable soups, tomato sauce, chicken croquettes, pizza                                                                                            |
| <b>Non-alcoholic beverages</b><br>(excluding coffee and tea)                   | tinned juice (e.g., tomato juice), pure fruit juice, soft drinks                                                            | fruit and vegetable juices, soft drinks, isotonic drinks, water                                                 | fruit juice, soft drinks, unalcoholic beer, tap water, bottled water                                                                                |
| <b>Alcoholic beverages</b>                                                     | N/A                                                                                                                         | wine, beer, liquors and spirits                                                                                 | wine, beer, liquors and spirits                                                                                                                     |
| <b>Miscellaneous</b><br>(e.g., soy products, diet foods and sweeteners)        | soy products (e.g., TVP, vegeburgers), bean curd (e.g., tofu)                                                               | diet products, soy products, artificial sweeteners                                                              | N/A                                                                                                                                                 |

**Abbreviations:** N/A, data not available; TVP, texturised vegetable protein.

**Supplemental Table 2** Determinants <sup>a</sup> of urinary iodine-to-creatinine ratio measured at  $\leq 18$  gestational weeks by cohort

| Determinants                             | ALSPAC (n=2852) |                         |                       | Generation R (n=2254) |                                   |                       | INMA (n=1460) |                         |                       |
|------------------------------------------|-----------------|-------------------------|-----------------------|-----------------------|-----------------------------------|-----------------------|---------------|-------------------------|-----------------------|
|                                          | <i>n</i>        | <i>B</i> (95% CI)       | <i>P</i> <sup>b</sup> | <i>n</i>              | <i>B</i> (95% CI)                 | <i>P</i> <sup>b</sup> | <i>n</i>      | <i>B</i> (95% CI)       | <i>P</i> <sup>b</sup> |
| <b>Maternal factors</b>                  |                 |                         |                       |                       |                                   |                       |               |                         |                       |
| Gestational age at urine sampling, weeks | 2852            | 0.051 (0.046, 0.057)    | <0.001                | 2254                  | 0.007 (-0.006, 0.019)             | 0.300                 | 1460          | 0.004 (-0.023, 0.032)   | 0.755                 |
| Age <sup>c</sup> , years                 | 2852            | 0.014 (0.008, 0.020)    | <0.001                | 2254                  | 0.018 (0.012, 0.024)              | <0.001                | 1460          | 0.020 (0.010, 0.030)    | <0.001                |
| Pre-pregnancy BMI, kg/m <sup>2</sup>     | 2852            | -0.013 (-0.019, -0.007) | <0.001                | 2254                  | -0.011 (-0.017, -0.006)           | <0.001                | 1460          | -0.013 (-0.022, -0.004) | 0.005                 |
| Ethnicity <sup>d</sup>                   |                 |                         |                       |                       |                                   |                       |               |                         |                       |
| Reference group                          | 2800            | Ref.                    |                       | 1095                  | Ref.                              |                       | 1340          | Ref.                    |                       |
| Non-white                                | 52              | -0.018 (-0.203, 0.168)  | 0.851                 | N/A                   | .                                 | .                     | N/A           | .                       | .                     |
| Non-Dutch                                | N/A             | .                       | .                     | 1159                  | (see separate table) <sup>e</sup> |                       | N/A           | .                       | .                     |
| Non-Spanish                              | N/A             | .                       | .                     | N/A                   | .                                 | .                     | 120           | -0.016 (-0.150, 0.118)  | 0.810                 |
| Parity                                   |                 |                         |                       |                       |                                   |                       |               |                         |                       |
| 0                                        | 1354            | Ref.                    |                       | 1279                  | Ref.                              |                       | 806           | Ref.                    |                       |
| 1                                        | 965             | 0.032 (-0.021, 0.085)   | 0.232                 | 665                   | -0.001 (-0.057, 0.056)            | 0.982                 | 544           | -0.029 (-0.110, 0.052)  | 0.481                 |
| $\geq 2$                                 | 533             | 0.040 (-0.029, 0.108)   | 0.254                 | 310                   | -0.041 (-0.123, 0.041)            | 0.327                 | 110           | -0.128 (-0.276, 0.020)  | 0.090                 |
| Smoking status                           |                 |                         |                       |                       |                                   |                       |               |                         |                       |
| Never smoked                             | 2169            | Ref.                    |                       | 1671                  | Ref.                              |                       | 1020          | Ref.                    |                       |
| Stopped smoking                          | 333             | -0.003 (-0.075, 0.070)  | 0.943                 | 211                   | -0.093 (-0.179, -0.007)           | 0.035                 | 187           | -0.060 (-0.172, 0.052)  | 0.296                 |
| Continued smoking                        | 350             | 0.018 (-0.055, 0.092)   | 0.620                 | 372                   | -0.008 (-0.083, 0.066)            | 0.831                 | 253           | -0.001 (-0.105, 0.104)  | 0.990                 |
| Alcohol consumption                      |                 |                         |                       |                       |                                   |                       |               |                         |                       |
| No                                       | 1350            | Ref.                    |                       | 1458                  | Ref.                              |                       | 1330          | Ref.                    |                       |
| Yes                                      | 1502            | -0.006 (-0.052, 0.040)  | 0.795                 | 796                   | -0.002 (-0.059, 0.055)            | 0.954                 | 130           | -0.051 (-0.181, 0.079)  | 0.442                 |

**Supplemental Table 2** Determinants <sup>a</sup> of urinary iodine-to-creatinine ratio measured at ≤ 18 gestational weeks by cohort (*continued*)

| Determinants                            | ALSPAC (n=2852) |                         |                       | Generation R (n=2254) |                        |                       | INMA (n=1460) |                        |                       |
|-----------------------------------------|-----------------|-------------------------|-----------------------|-----------------------|------------------------|-----------------------|---------------|------------------------|-----------------------|
|                                         | <i>n</i>        | <i>B</i> (95% CI)       | <i>P</i> <sup>b</sup> | <i>n</i>              | <i>B</i> (95% CI)      | <i>P</i> <sup>b</sup> | <i>n</i>      | <i>B</i> (95% CI)      | <i>P</i> <sup>b</sup> |
| <b>Markers of socio-economic status</b> |                 |                         |                       |                       |                        |                       |               |                        |                       |
| Education level                         |                 |                         |                       |                       |                        |                       |               |                        |                       |
| Low                                     | 576             | Ref.                    |                       | 247                   | Ref.                   |                       | 337           | Ref.                   |                       |
| Medium                                  | 1780            | 0.005 (-0.056, 0.066)   | 0.869                 | 995                   | -0.077 (-0.165, 0.012) | 0.089                 | 581           | -0.016 (-0.112, 0.079) | 0.736                 |
| High                                    | 496             | 0.026 (-0.055, 0.107)   | 0.531                 | 1012                  | -0.057 (-0.159, 0.045) | 0.272                 | 542           | 0.089 (-0.013, 0.190)  | 0.088                 |
| Net household income (€ per month)      |                 |                         |                       |                       |                        |                       |               |                        |                       |
| Low < €1200                             | N/A             | .                       | .                     | 492                   | Ref.                   |                       | N/A           | .                      | .                     |
| Medium €1200-2200                       | N/A             | .                       | .                     | 597                   | 0.022 (-0.063, 0.108)  | 0.606                 | N/A           | .                      | .                     |
| High > €2200                            | N/A             | .                       | .                     | 1165                  | 0.089 (-0.001, 0.179)  | 0.054                 | N/A           | .                      | .                     |
| Home ownership                          |                 |                         |                       |                       |                        |                       |               |                        |                       |
| Owned/mortgaged                         | 2425            | Ref.                    |                       | N/A                   | .                      | .                     | N/A           | .                      | .                     |
| Private/other rented                    | 236             | -0.037 (-0.126, 0.053)  | 0.422                 | N/A                   | .                      | .                     | N/A           | .                      | .                     |
| Council rented                          | 191             | -0.032 (-0.136, 0.072)  | 0.547                 | N/A                   | .                      | .                     | N/A           | .                      | .                     |
| Crowding index                          |                 |                         |                       |                       |                        |                       |               |                        |                       |
| ≤ 1 person per room                     | 2747            | Ref.                    |                       | N/A                   | .                      | .                     | N/A           | .                      | .                     |
| + 1 person per room                     | 105             | 0.134 (-0.006, 0.274)   | 0.060                 | N/A                   | .                      | .                     | N/A           | .                      | .                     |
| Family adversity index                  |                 |                         |                       |                       |                        |                       |               |                        |                       |
| None 0                                  | 1395            | Ref.                    |                       | N/A                   | .                      | .                     | N/A           | .                      | .                     |
| Mild 1-2                                | 1124            | -0.007 (-0.056, 0.041)  | 0.765                 | N/A                   | .                      | .                     | N/A           | .                      | .                     |
| Severe > 3                              | 333             | -0.100 (-0.182, -0.018) | 0.016                 | N/A                   | .                      | .                     | N/A           | .                      | .                     |
| Life event score                        | 2852            | 0.007 (-0.001, 0.015)   | 0.097                 | N/A                   | .                      | .                     | N/A           | .                      | .                     |

**Supplemental Table 2** Determinants <sup>a</sup> of urinary iodine-to-creatinine ratio measured at  $\leq 18$  gestational weeks by cohort (*continued*)

| Determinants                            | ALSPAC (n=2852) |                        |                       | Generation R (n=2254) |                        |                       | INMA (n=1460) |                        |                       |
|-----------------------------------------|-----------------|------------------------|-----------------------|-----------------------|------------------------|-----------------------|---------------|------------------------|-----------------------|
|                                         | <i>n</i>        | <i>B</i> (95% CI)      | <i>P</i> <sup>b</sup> | <i>n</i>              | <i>B</i> (95% CI)      | <i>P</i> <sup>b</sup> | <i>n</i>      | <i>B</i> (95% CI)      | <i>P</i> <sup>b</sup> |
| <b>Markers of socio-economic status</b> |                 |                        |                       |                       |                        |                       |               |                        |                       |
| Marital status                          |                 |                        |                       |                       |                        |                       |               |                        |                       |
| Never-married                           | 355             | Ref.                   |                       | 1136                  | Ref.                   |                       | N/A           | .                      | .                     |
| Married                                 | 2357            | 0.095 (0.018, 0.171)   | 0.015                 | 1118                  | 0.030 (-0.025, 0.086)  | 0.285                 | N/A           | .                      | .                     |
| Other <sup>f</sup>                      | 140             | 0.028 (-0.097, 0.153)  | 0.666                 | N/A                   | .                      | .                     | N/A           | .                      | .                     |
| Living with a partner                   |                 |                        |                       |                       |                        |                       |               |                        |                       |
| Yes                                     | N/A             | .                      | .                     | N/A                   | .                      | .                     | 1445          | Ref.                   |                       |
| No                                      | N/A             | .                      | .                     | N/A                   | .                      | .                     | 15            | -0.233 (-0.598, 0.131) | 0.209                 |
| <b>Child factors</b>                    |                 |                        |                       |                       |                        |                       |               |                        |                       |
| Child's sex                             |                 |                        |                       |                       |                        |                       |               |                        |                       |
| Male                                    | 1405            | Ref.                   |                       | 1147                  | Ref.                   |                       | 737           | Ref.                   |                       |
| Female                                  | 1447            | -0.025 (-0.070, 0.019) | 0.261                 | 1107                  | -0.026 (-0.073, 0.021) | 0.278                 | 723           | -0.014 (-0.087, 0.058) | 0.700                 |

<sup>a</sup> Effect estimates (*B*=unstandardized regression coefficient), their 95% CIs and *P*-values from multiple linear regression models performed for each cohort with (natural) log-transformed iodine-to-creatinine ratio (UI/Creat) as the dependent variable and maternal characteristics as independent variables (for full models, see footnote b). Reported *B* coefficients represent the change in the mean (natural) log of UI/Creat per unit increase in the continuous independent variables and for each category compared to the reference for the categorical independent variables.

<sup>b</sup> *P*-values from adjusted Model 1 (adjusted for maternal and pregnancy characteristics); ALSPAC ( $R^2=0.123$ ,  $P < 0.0001$ ): gestational age (weeks), age (years), pre-pregnancy BMI ( $\text{kg}/\text{m}^2$ ), ethnicity, parity, smoking status, alcohol consumption, education, home ownership, crowding index, family adversity index, life event score, marital status and child's sex; Generation R ( $R^2=0.086$ ,  $P < 0.0001$ ): gestational age (weeks), age (years), pre-pregnancy BMI ( $\text{kg}/\text{m}^2$ ), ethnicity, parity, smoking status, alcohol consumption, education, net household income, marital status and child's sex; INMA ( $R^2=0.021$ ,  $P < 0.0001$ ): gestational age (weeks), age (years), pre-pregnancy BMI ( $\text{kg}/\text{m}^2$ ), ethnicity, parity, smoking status, alcohol consumption, education, living with a partner and child's sex.

<sup>c</sup> Maternal age at urine sample collection, except in ALSPAC (age at last menstrual period).

<sup>d</sup> ALSPAC (Reference group=White); Generation R (Reference group=Dutch, Non-Dutch=Indonesian, Cape Verdian, Moroccan, Dutch Antilles, Surinamese, Turkish, Other non-western, Asian, or Other western); INMA (Reference group=Spanish, Non-Spanish=Latin American, European, or Others).

<sup>e</sup> Non-Dutch group in Generation R presented in detail in Table 3.

<sup>f</sup> ALSPAC (Other=widowed, divorced, or separated).

**Abbreviations:** BMI, body mass index; 95% CI, confidence interval; N/A, data not available or not applicable; Ref, reference category; UI/Creat, urinary iodine-to-creatinine ratio.



**Supplemental Table 3** Determinants <sup>a</sup> of urinary iodine concentration measured at  $\leq 18$  gestational weeks by cohort

| Determinants                             | ALSPAC (n=2852)               |          |          |                               |          |          | Generation R (n=2254)         |          |          |                               |          |          | INMA (n=1460)                 |          |          |                               |          |          |
|------------------------------------------|-------------------------------|----------|----------|-------------------------------|----------|----------|-------------------------------|----------|----------|-------------------------------|----------|----------|-------------------------------|----------|----------|-------------------------------|----------|----------|
|                                          | Adjusted Model 1 <sup>b</sup> |          |          | Adjusted Model 2 <sup>c</sup> |          |          | Adjusted Model 1 <sup>b</sup> |          |          | Adjusted Model 2 <sup>c</sup> |          |          | Adjusted Model 1 <sup>b</sup> |          |          | Adjusted Model 2 <sup>c</sup> |          |          |
|                                          | <i>n</i>                      | <i>B</i> | <i>P</i> |
| Gestational age at urine sampling, weeks | 2852                          | 0.033    | <0.001   | 2710                          | 0.034    | <0.001   | 2254                          | 0.014    | 0.020    | 1580                          | 0.021    | 0.004    | 1460                          | 0.009    | 0.516    | 1446                          | -0.007   | 0.605    |
| Age <sup>d</sup> , years                 | 2852                          | 0.009    | 0.002    | 2710                          | 0.006    | 0.063    | 2254                          | 0.011    | <0.001   | 1580                          | 0.010    | 0.009    | 1460                          | 0.019    | <0.001   | 1446                          | 0.013    | 0.008    |
| Pre-pregnancy BMI, kg/m <sup>2</sup>     | 2852                          | -0.009   | 0.004    | 2710                          | -0.009   | 0.008    | 2254                          | -0.003   | 0.279    | 1580                          | -0.004   | 0.192    | 1460                          | -0.007   | 0.113    | 1446                          | -0.002   | 0.650    |
| Family adversity index                   |                               |          |          |                               |          |          |                               |          |          |                               |          |          |                               |          |          |                               |          |          |
| None 0                                   | 1395                          | Ref.     |          | 1334                          | Ref.     |          | N/A                           | .        | .        | .                             | .        | .        | N/A                           | .        | .        | .                             | .        | .        |
| Mild 1-2                                 | 1124                          | -0.025   | 0.309    | 1069                          | -0.020   | 0.423    | N/A                           | .        | .        | .                             | .        | .        | N/A                           | .        | .        | .                             | .        | .        |
| Severe > 3                               | 333                           | -0.112   | 0.008    | 307                           | -0.101   | 0.019    | N/A                           | .        | .        | .                             | .        | .        | N/A                           | .        | .        | .                             | .        | .        |
| Marital status                           |                               |          |          |                               |          |          |                               |          |          |                               |          |          |                               |          |          |                               |          |          |
| Never-married                            | 355                           | Ref.     |          | 320                           | Ref.     |          | 1136                          | Ref.     |          | 825                           | Ref.     |          | N/A                           | .        | .        | .                             | .        | .        |
| Married                                  | 2357                          | 0.044    | 0.257    | 2269                          | 0.078    | 0.054    | 1118                          | 0.034    | 0.208    | 755                           | 0.042    | 0.179    | N/A                           | .        | .        | .                             | .        | .        |
| Other <sup>e</sup>                       | 140                           | -0.015   | 0.815    | 121                           | 0.009    | 0.889    | N/A                           | .        | .        | .                             | .        | .        | N/A                           | .        | .        | .                             | .        | .        |
| Ethnicity <sup>f</sup>                   |                               |          |          |                               |          |          |                               |          |          |                               |          |          |                               |          |          |                               |          |          |
| Reference group                          | 2800                          | Ref.     |          | 2674                          | Ref.     |          | 1095                          | Ref.     |          | 930                           | Ref.     |          | 1340                          | Ref.     |          | 1328                          | Ref.     |          |
| Non-white                                | 52                            | 0.048    | 0.611    | 36                            | 0.109    | 0.284    | N/A                           | .        | .        | .                             | .        | .        | N/A                           | .        | .        | .                             | .        | .        |
| Non-Dutch:                               | N/A                           | .        | .        | .                             | .        | .        |                               |          |          |                               |          |          | N/A                           | .        | .        | .                             | .        | .        |
| - Indonesian                             | N/A                           | .        | .        | .                             | .        | .        | 72                            | -0.012   | 0.861    | 58                            | -0.026   | 0.725    | N/A                           | .        | .        | .                             | .        | .        |
| - Cape Verdian                           | N/A                           | .        | .        | .                             | .        | .        | 87                            | 0.061    | 0.370    | 41                            | 0.150    | 0.112    | N/A                           | .        | .        | .                             | .        | .        |
| - Moroccan                               | N/A                           | .        | .        | .                             | .        | .        | 165                           | 0.286    | <0.001   | 72                            | 0.242    | 0.003    | N/A                           | .        | .        | .                             | .        | .        |
| - Dutch Antilles                         | N/A                           | .        | .        | .                             | .        | .        | 65                            | -0.064   | 0.393    | 37                            | -0.117   | 0.245    | N/A                           | .        | .        | .                             | .        | .        |
| - Surinamese                             | N/A                           | .        | .        | .                             | .        | .        | 196                           | -0.046   | 0.327    | 111                           | -0.024   | 0.698    | N/A                           | .        | .        | .                             | .        | .        |
| - Turkish                                | N/A                           | .        | .        | .                             | .        | .        | 226                           | 0.323    | <0.001   | 103                           | 0.308    | <0.001   | N/A                           | .        | .        | .                             | .        | .        |
| - Other, non-western                     | N/A                           | .        | .        | .                             | .        | .        | 107                           | 0.125    | 0.034    | 53                            | 0.054    | 0.502    | N/A                           | .        | .        | .                             | .        | .        |
| - Asian                                  | N/A                           | .        | .        | .                             | .        | .        | 32                            | 0.062    | 0.544    | 19                            | 0.022    | 0.863    | N/A                           | .        | .        | .                             | .        | .        |
| - Other, western                         | N/A                           | .        | .        | .                             | .        | .        | 209                           | 0.023    | 0.575    | 156                           | 0.050    | 0.297    | N/A                           | .        | .        | .                             | .        | .        |
| Non-Spanish                              | N/A                           | .        | .        | .                             | .        | .        | N/A                           | .        | .        | .                             | .        | .        | 120                           | 0.007    | 0.909    | 118                           | 0.032    | 0.627    |

**Supplemental Table 3** Determinants <sup>a</sup> of urinary iodine concentration measured at  $\leq 18$  gestational weeks by cohort (*continued*)

| Determinants      | ALSPAC (n=2852)               |          |          |                               |          |          | Generation R (n=2254)         |          |          |                               |          |          | INMA (n=1460)                 |          |          |                               |          |          |  |
|-------------------|-------------------------------|----------|----------|-------------------------------|----------|----------|-------------------------------|----------|----------|-------------------------------|----------|----------|-------------------------------|----------|----------|-------------------------------|----------|----------|--|
|                   | Adjusted Model 1 <sup>b</sup> |          |          | Adjusted Model 2 <sup>c</sup> |          |          | Adjusted Model 1 <sup>b</sup> |          |          | Adjusted Model 2 <sup>c</sup> |          |          | Adjusted Model 1 <sup>b</sup> |          |          | Adjusted Model 2 <sup>c</sup> |          |          |  |
|                   | <i>n</i>                      | <i>B</i> | <i>P</i> |  |
| Smoking status    |                               |          |          |                               |          |          |                               |          |          |                               |          |          |                               |          |          |                               |          |          |  |
| Never smoked      | 2169                          | Ref.     |          | 2077                          | Ref.     |          | 1671                          | Ref.     |          | 1202                          | Ref.     |          | 1020                          | Ref.     |          | 1011                          | Ref.     |          |  |
| Stopped smoking   | 333                           | -0.008   | 0.825    | 312                           | -0.015   | 0.686    | 211                           | -0.078   | 0.065    | 147                           | -0.120   | 0.016    | 187                           | -0.097   | 0.077    | 186                           | -0.096   | 0.076    |  |
| Continued smoking | 350                           | 0.005    | 0.896    | 321                           | 0.034    | 0.380    | 372                           | 0.021    | 0.557    | 231                           | 0.039    | 0.385    | 253                           | -0.015   | 0.765    | 249                           | 0.010    | 0.838    |  |

<sup>a</sup> Effect estimates ( $B$ =unstandardised regression coefficient) and  $P$ -values from multiple linear regression models performed for each cohort with (natural) log-transformed urinary iodine concentration (UIC) as the dependent variable and maternal characteristics and dietary intakes as independent variables (for full models, see footnotes b and c). All models were additionally adjusted for urinary creatinine concentration (UCreat, g/L). Reported  $B$  coefficients represent the change in the mean (natural) log of UIC per unit increase in the continuous independent variables and for each category compared to the reference for the categorical independent variables.

<sup>b</sup> Adjusted Model 1 (adjusted for maternal and pregnancy characteristics); ALSPAC ( $R^2=0.424$ ,  $P < 0.0001$ ): gestational age (weeks), age (years), pre-pregnancy BMI ( $\text{kg/m}^2$ ), ethnicity, parity, smoking status, alcohol consumption, education, home ownership, crowding index, family adversity index, life event score, marital status, child's sex, UCreat (g/L) and UCreat<sup>2</sup>; Generation R ( $R^2=0.525$ ,  $P < 0.0001$ ): gestational age (weeks), age (years), pre-pregnancy BMI ( $\text{kg/m}^2$ ), ethnicity, parity, smoking status, alcohol consumption, education, net household income, marital status, child's sex, UCreat (g/L) and UCreat<sup>2</sup>; INMA ( $R^2=0.193$ ,  $P < 0.0001$ ): gestational age (weeks), age (years), pre-pregnancy BMI ( $\text{kg/m}^2$ ), ethnicity, parity, smoking status, alcohol consumption, education, living with a partner, child's sex, UCreat (g/L) and UCreat<sup>2</sup>.

<sup>c</sup> Adjusted Model 2 (adjusted for maternal and pregnancy characteristics + dietary intakes); ALSPAC ( $R^2=0.443$ ,  $P < 0.0001$ ): Model 1 + energy intake (kcal/day) + intake of vegetables (g/day), fruit (g/day), nuts and seeds (g/day), potatoes (g/day), legumes (g/day), cereals and cereal products (g/day), cakes, confectionery and added sugar (g/day), added fats (g/day), milk and dairy products (g/day), meat and meat products (g/day), eggs (g/day), fish and shellfish (g/day), processed and fried foods (g/day), non-alcoholic beverages (g/day), miscellaneous (g/day); Generation R ( $R^2=0.548$ ,  $P < 0.0001$ ): Model 1 + energy intake (kcal/day) + intake of vegetables (g/day), fruit (g/day), nuts and seeds (g/day), potatoes (g/day), legumes (g/day), cereals and cereal products (g/day), cakes, confectionery and added sugar (g/day), added fats (g/day), milk and dairy products (g/day), meat and meat products (g/day), eggs (g/day), fish and shellfish (g/day), condiments and seasoning (g/day), processed and fried foods (g/day), non-alcoholic beverages (g/day), alcoholic beverages (g/day), miscellaneous (g/day); INMA ( $R^2=0.227$ ,  $P < 0.0001$ ): Model 1 + energy intake (kcal/day) + intake of vegetables (g/day), fruit (g/day), nuts and seeds (g/day), potatoes (g/day), legumes (g/day), cereals and cereal products (g/day), cakes, confectionery and added sugar (g/day), added fats (g/day), milk and dairy products (g/day), meat and meat products (g/day), eggs (g/day), fish and shellfish (g/day), condiments and seasoning (e.g., salt) (g/day), processed and fried foods (g/day), non-alcoholic beverages (g/day), alcoholic beverages (g/day).

<sup>d</sup> Maternal age at urine sample collection, except in ALSPAC (age at last menstrual period).

<sup>e</sup> ALSPAC (Other=widowed, divorced, or separated).

<sup>f</sup> ALSPAC (Reference group=White); Generation R (Reference group=Dutch, Non-Dutch=Indonesian, Cape Verdian, Moroccan, Dutch Antilles, Surinamese, Turkish, Other non-western, Asian, or Other western); INMA (Reference group=Spanish, Non-Spanish=Latin American, European, or Others).

**Abbreviations:** BMI, body mass index; N/A, data not available or not applicable; Ref, reference category; UCreat, urinary creatinine concentration; UCreat<sup>2</sup>, squared urinary creatinine concentration; UIC, urinary iodine concentration.

**Supplemental Table 4** Descriptives of dietary intakes of food groups (g/day) and energy intake (kcal/day) estimated from FFQ by cohort

| <b>Food group (grams/day)</b> <sup>a</sup>                           | <b>ALSPAC</b><br><b>(n=2710)</b> | <b>Generation R</b><br><b>(n=1580)</b> | <b>INMA</b><br><b>(n=1446)</b> |
|----------------------------------------------------------------------|----------------------------------|----------------------------------------|--------------------------------|
|                                                                      | <i>Mean (±SD)</i>                | <i>Mean (±SD)</i>                      | <i>Mean (±SD)</i>              |
| Vegetables                                                           | 117 (±64)                        | 144 (±64)                              | 220 (±114)                     |
| Fruit                                                                | 100 (±56)                        | 171 (±116)                             | 320 (±200)                     |
| Nuts and seeds                                                       | 3 (±7)                           | 17 (±12)                               | 6 (±9)                         |
| Potatoes                                                             | 98 (±49)                         | 52 (±43)                               | 63 (±37)                       |
| Legumes                                                              | 54 (±32)                         | 4 (±7)                                 | 38 (±25)                       |
| Cereals and cereal products                                          | 195 (±79)                        | 195 (±71)                              | 184 (±77)                      |
| Cakes, confectionery and added sugar                                 | 80 (±55)                         | 98 (±56)                               | 44 (±36)                       |
| Added fats                                                           | 19 (±11)                         | 25 (±14)                               | 23 (±15)                       |
| Milk and dairy products                                              | 391 (±155)                       | 412 (±251)                             | 444 (±233)                     |
| Meat and meat products                                               | 71 (±40)                         | 78 (±43)                               | 116 (±50)                      |
| Eggs                                                                 | 21 (±18)                         | 11 (±10)                               | 20 (±9)                        |
| Fish and shellfish                                                   | 35 (±30)                         | 14 (±13)                               | 69 (±36)                       |
| Condiments and seasoning (e.g., salt, iodised salt)                  | N/A                              | 6 (±5)                                 | 0.3 (±0.4)                     |
| Processed and fried foods (e.g., sauces, soups, fried foods, crisps) | 8 (±8)                           | 100 (±90)                              | 101 (±66)                      |
| Non-alcoholic beverages (excluding coffee and tea) <sup>b</sup>      | 175 (±83)                        | 940 (±550)                             | 1488 (±494)                    |
| Alcoholic beverages                                                  | N/A                              | 6 (±17)                                | 3 (±13)                        |
| Miscellaneous (e.g., soy products, diet foods and sweeteners)        | 2 (±9)                           | 6 (±20)                                | N/A                            |
| Energy, kcal/day                                                     | 1743 (±459)                      | 2076 (±520)                            | 2083 (±532)                    |

<sup>a</sup> Dietary intake of food groups presented as mean (±SD) grams per day, energy intake presented as mean (±SD) kcal per day.

<sup>b</sup> Food group also includes water in INMA and Generation R (but not in ALSPAC).

**Abbreviations:** FFQ, food frequency questionnaire; N/A, data not available; SD, standard deviation.

**Supplemental Table 5** Multivariable associations of food group intakes estimated from FFQ (per 100 g/day)<sup>a</sup> with urinary iodine-to-creatinine ratio measured at ≤ 18 gestational weeks by cohort

| Food group intakes (per 100 g/day) <sup>a</sup>                         | ALSPAC (n=2710)                |                       | Generation R (n=1580)          |                       | INMA (n=1446)                  |                       |
|-------------------------------------------------------------------------|--------------------------------|-----------------------|--------------------------------|-----------------------|--------------------------------|-----------------------|
|                                                                         | <i>B</i> (95% CI) <sup>b</sup> | <i>P</i> <sup>c</sup> | <i>B</i> (95% CI) <sup>b</sup> | <i>P</i> <sup>d</sup> | <i>B</i> (95% CI) <sup>b</sup> | <i>P</i> <sup>e</sup> |
| Vegetables                                                              | 0.24 (-1.51, 2.06)             | 0.791                 | -0.76 (-4.78, 3.46)            | 0.719                 | 0.48 (-7.07, 8.31)             | 0.903                 |
| Fruit                                                                   | 2.79 (0.59, 5.09)              | 0.012                 | 1.13 (-1.12, 3.45)             | 0.328                 | -4.38 (-8.91, 0.26)            | 0.064                 |
| Nuts and seeds                                                          | 19.30 (-2.05, 51.25)           | 0.083                 | 51.07 (17.18, 96.03)           | 0.001                 | 68.80 (-33.30, 230.33)         | 0.223                 |
| Potatoes                                                                | 2.66 (-0.20, 5.71)             | 0.069                 | 5.92 (-1.17, 13.61)            | 0.104                 | -16.46 (-36.05, 5.36)          | 0.134                 |
| Legumes                                                                 | 2.33 (-1.33, 6.29)             | 0.219                 | 16.98 (-17.38, 68.39)          | 0.384                 | 28.00 (-5.39, 66.86)           | 0.105                 |
| Cereals and cereal products                                             | 1.42 (-0.92, 3.88)             | 0.238                 | 12.32 (6.34, 18.69)            | <0.001                | 0.21 (-13.90, 15.34)           | 0.978                 |
| Cakes, confectionery and added sugar                                    | 4.90 (0.50, 9.73)              | 0.028                 | 5.36 (-2.24, 13.64)            | 0.172                 | -17.98 (-43.38, 11.33)         | 0.217                 |
| Added fats <sup>a</sup>                                                 | 0.11 (-0.01, 0.24)             | 0.082                 | 0.27 (0.04, 0.50)              | 0.022                 | -0.42 (-1.13, 0.29)            | 0.243                 |
| Milk and dairy products                                                 | 3.73 (2.74, 4.74)              | <0.001                | 2.34 (1.00, 3.70)              | 0.001                 | 6.92 (2.52, 11.41)             | 0.002                 |
| Meat and meat products                                                  | 1.27 (-2.30, 5.13)             | 0.497                 | 2.87 (-4.14, 10.49)            | 0.433                 | -32.71 (-50.77, -12.58)        | 0.002                 |
| Eggs                                                                    | 5.44 (-1.18, 13.06)            | 0.112                 | 65.32 (26.28, 117.87)          | <0.001                | 86.92 (-13.13, 238.12)         | 0.099                 |
| Fish and shellfish                                                      | 5.10 (0.89, 9.70)              | 0.017                 | 2.01 (-16.18, 24.91)           | 0.845                 | 28.04 (2.73, 56.38)            | 0.029                 |
| Condiments and seasoning (e.g., salt) <sup>a,f</sup>                    | N/A                            | .                     | 0.27 (-0.30, 0.84)             | 0.359                 | 31.69 (10.31, 55.16)           | 0.003                 |
| Processed and fried foods<br>(e.g., sauces, soups, fried foods, crisps) | 0.85 (-12.40, 19.47)           | 0.915                 | 1.88 (-0.98, 4.83)             | 0.199                 | 0.00 (-11.26, 11.91)           | 0.999                 |
| Non-alcoholic beverages<br>(excluding coffee and tea)                   | 0.62 (-0.71, 1.99)             | 0.367                 | 0.40 (-0.07, 0.87)             | 0.099                 | -1.46 (-3.05, 0.13)            | 0.072                 |
| Alcoholic beverages                                                     | N/A                            | .                     | 13.86 (-1.99, 32.66)           | 0.090                 | -34.72 (-85.12, 36.20)         | 0.297                 |
| Miscellaneous (e.g., soy products, diet<br>foods and sweeteners)        | 14.61 (-0.70, 35.22)           | 0.063                 | 8.13 (-4.77, 23.06)            | 0.230                 | N/A                            | .                     |

<sup>a</sup> Added fats and salt intakes expressed per 1 g/day.

<sup>b</sup> Effect estimates (*B*=unstandardized regression coefficient) represent the actual change in the geometric mean of UI/Creat (μg/g) associated with 100 g increase in intake of a food group. *B* coefficients and their 95% CIs are calculated by back-transformation from logarithmic scale (see methods). Values are adjusted for dietary intake of other food groups, energy intake and other potential confounders (for full models, see Table 3, footnote c). When calculating the *B* coefficients

all categorical covariates were set to their reference group and the continuous covariates gestational age, maternal age, pre-pregnancy BMI and energy intake were centred to their means.

<sup>c</sup> *P*-value adjusted for energy (kcal/day) + gestational age (weeks), age (years), pre-pregnancy BMI (kg/m<sup>2</sup>), ethnicity, parity, smoking status, alcohol consumption, education, home ownership, crowding index, family adversity index, life event score, marital status and child's sex ( $R^2=0.147$ ,  $P < 0.0001$ ).

<sup>d</sup> *P*-values adjusted for energy (kcal/day) + gestational age (weeks), age (years), pre-pregnancy BMI (kg/m<sup>2</sup>), ethnicity, parity, smoking status, alcohol consumption, education, net household income, marital status and child's sex ( $R^2=0.091$ ,  $P < 0.0001$ ).

<sup>e</sup> *P*-values adjusted for energy (kcal/day) + gestational age (weeks), age (years), pre-pregnancy BMI (kg/m<sup>2</sup>), ethnicity, parity, smoking status, alcohol consumption, education, living with a partner and child's sex ( $R^2=0.060$ ,  $P < 0.0001$ ).

<sup>f</sup> In INMA this food group also includes iodised salt. Separate information about the consumption of table salt and use of iodine-fortified table salt was collected only in the INMA cohort.

**Abbreviations:** BMI, body mass index; 95% CI, confidence interval; FFQ, food frequency questionnaire; N/A, data not available; UI/Creat, urinary iodine-to-creatinine ratio.
